# Supplementary material for: N-Aryl Arenedicarboximides as Tunable Panchromatic Dyes for Molecular Solar Cells
Source: Hindawi journal article supplement (doi:10.1155/2010/264643), 2010-01-01

## Supporting Information

# *N*-Aryl Arenedicarboximides as Panchromatic Dyes for Molecular Solar Cells

*Zhi Cao, Premchendar Nandhikanda, Adriana Penuela, Stephanie Nance, Michael D.  
Heagy\**

Department of Chemistry

New Mexico Tech, Socorro NM 87801

[mheagy@nmt.edu](mailto:mheagy@nmt.edu)

### Contents of Supporting Information

|                                                                              |         |
|------------------------------------------------------------------------------|---------|
| <sup>1</sup> H and <sup>13</sup> C NMR Spectra of sensitizer <b>1</b> .....  | S2-S3   |
| <sup>1</sup> H and <sup>13</sup> C NMR Spectra of sensitizer <b>2</b> .....  | S4-S5   |
| <sup>1</sup> H and <sup>13</sup> C NMR Spectra of sensitizer <b>I1</b> ..... | S6-S7   |
| <sup>1</sup> H and <sup>13</sup> C NMR Spectra of sensitizer <b>I2</b> ..... | S8-S9   |
| <sup>1</sup> H and <sup>13</sup> C NMR Spectra of sensitizer <b>3</b> .....  | S10-S11 |

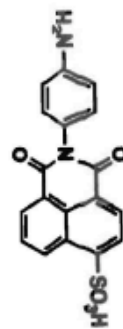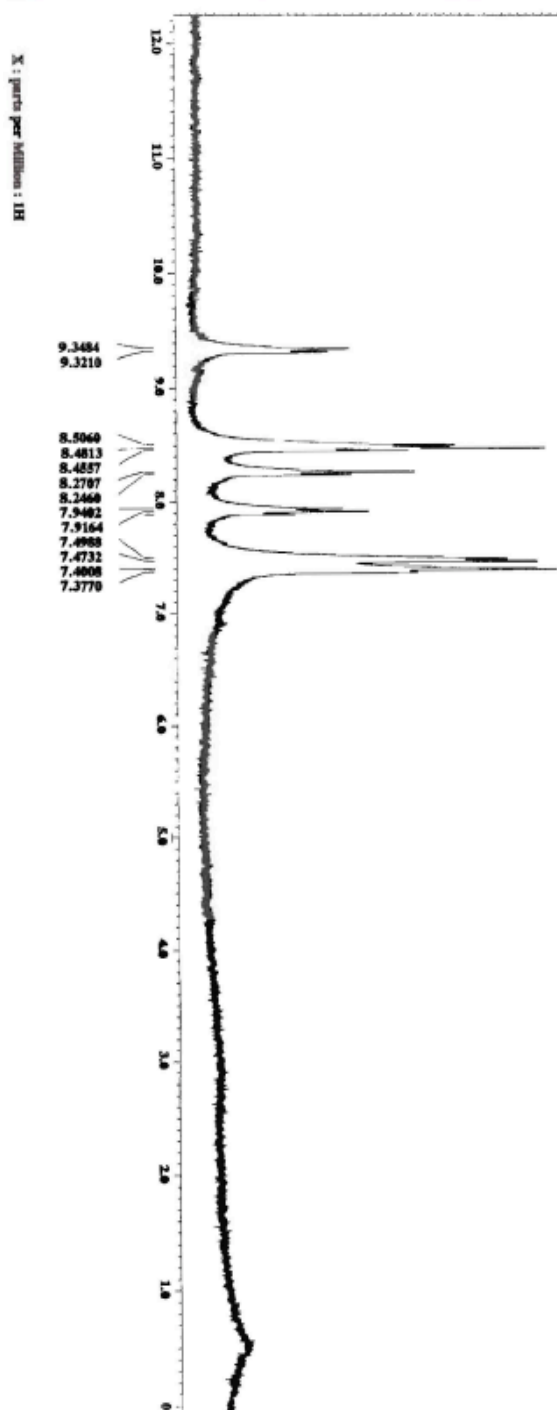

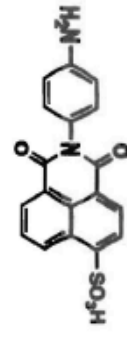

69 x 8.50

X : parts per Million : 1XC

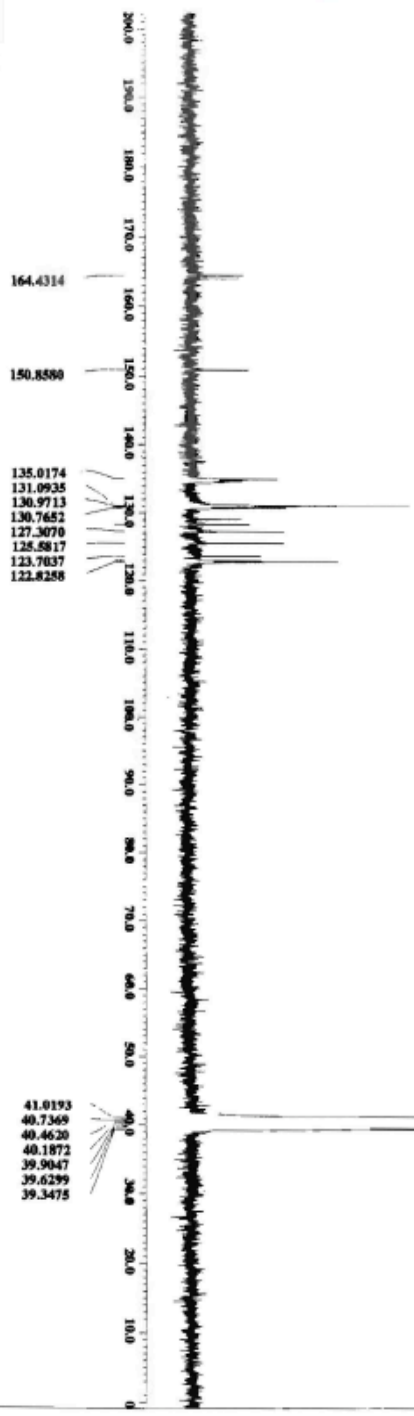

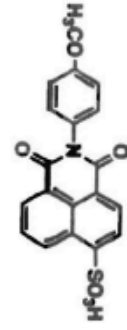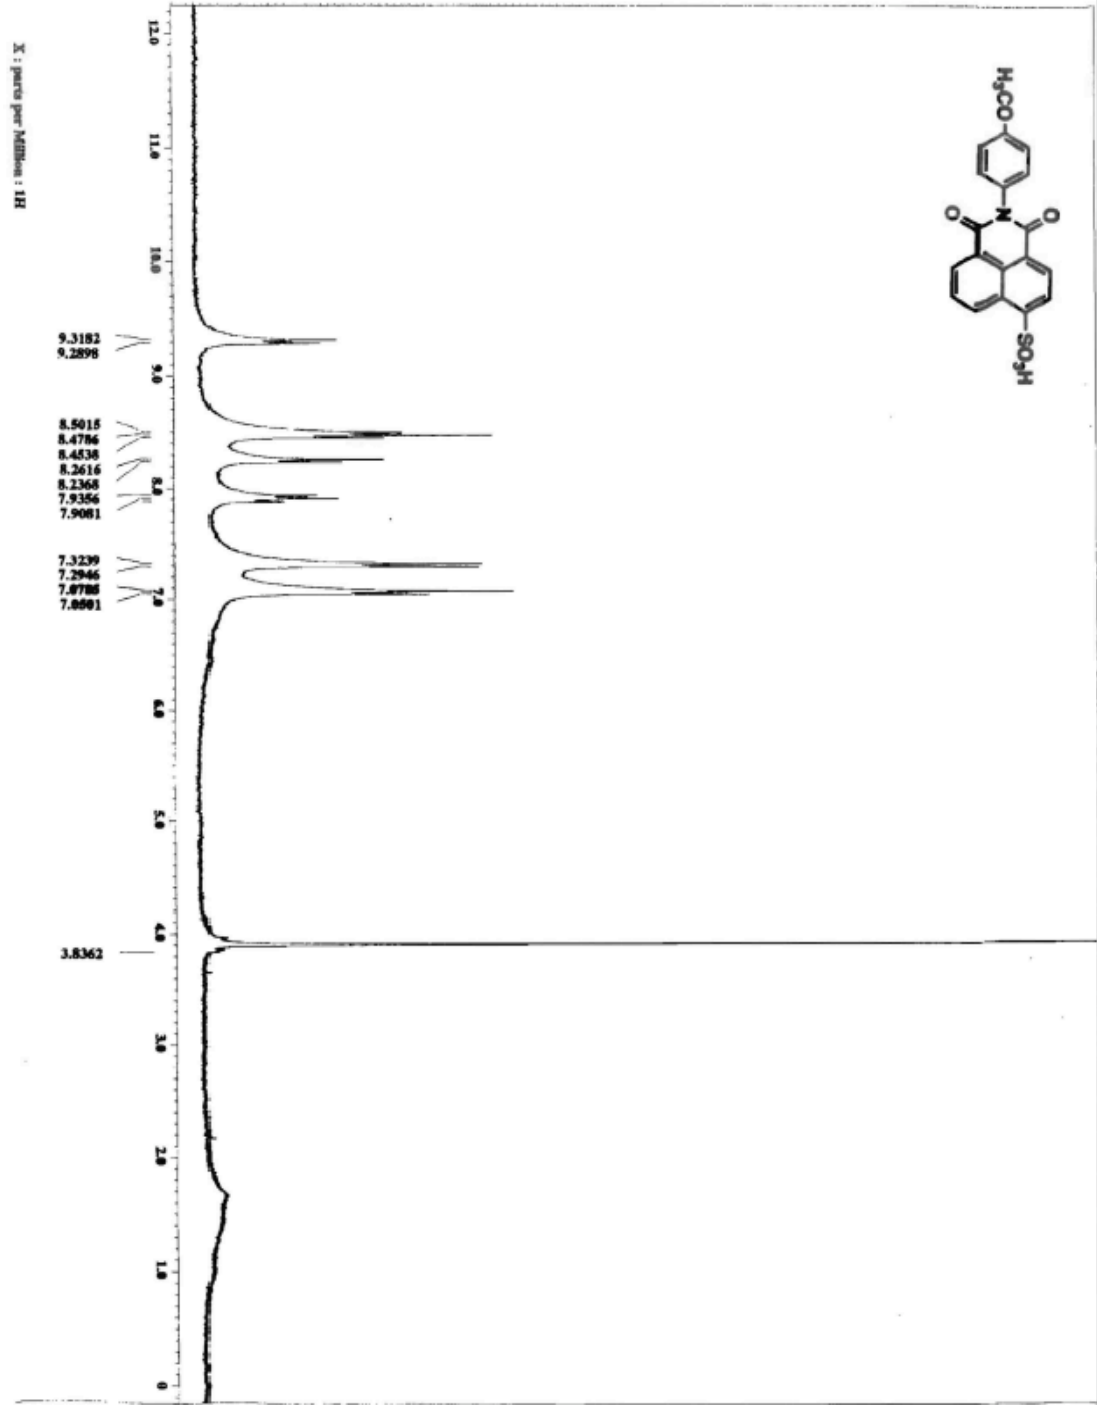

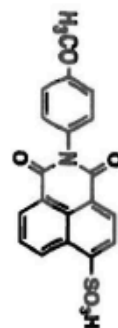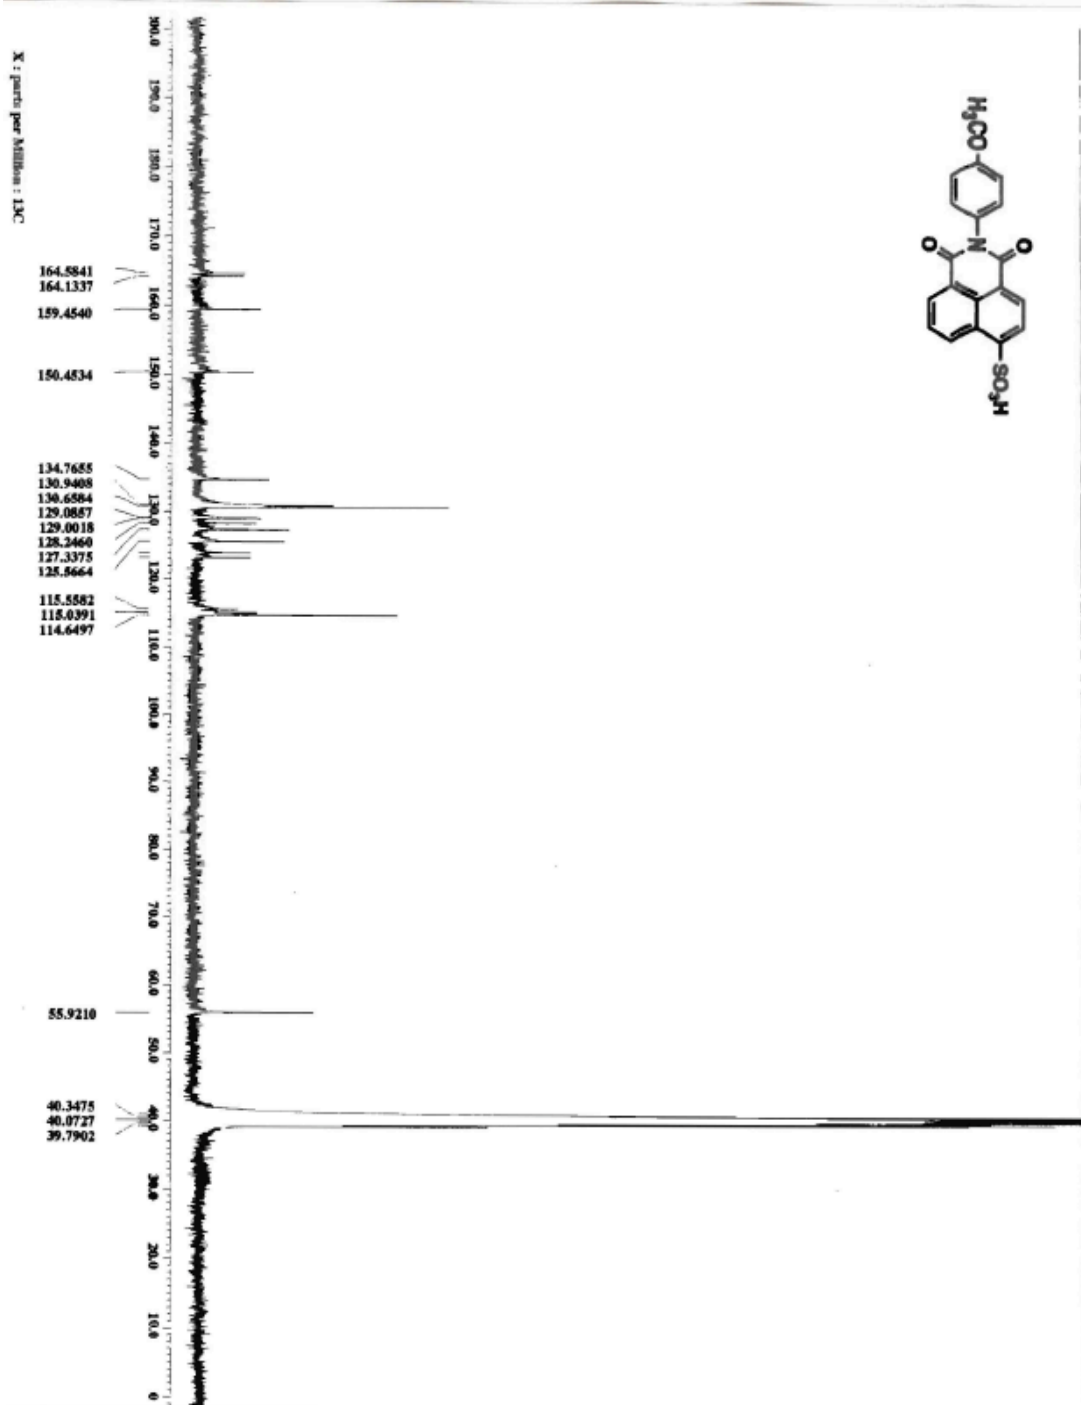

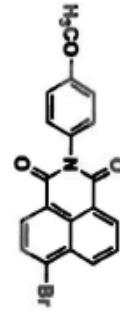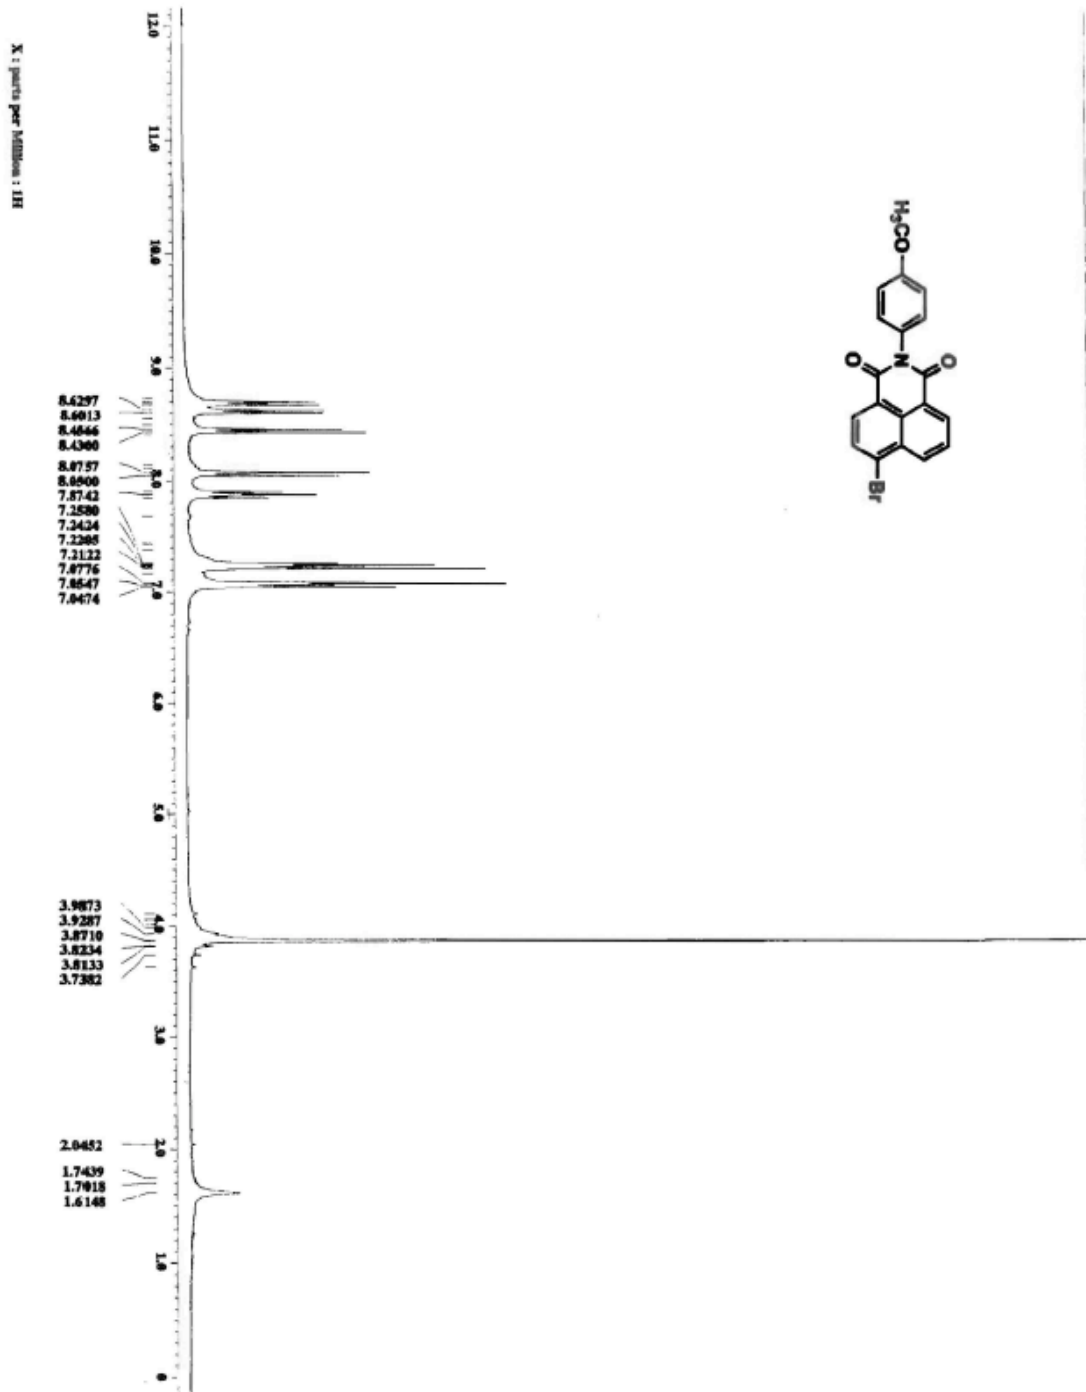

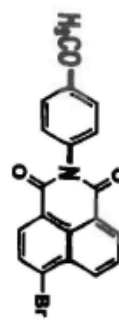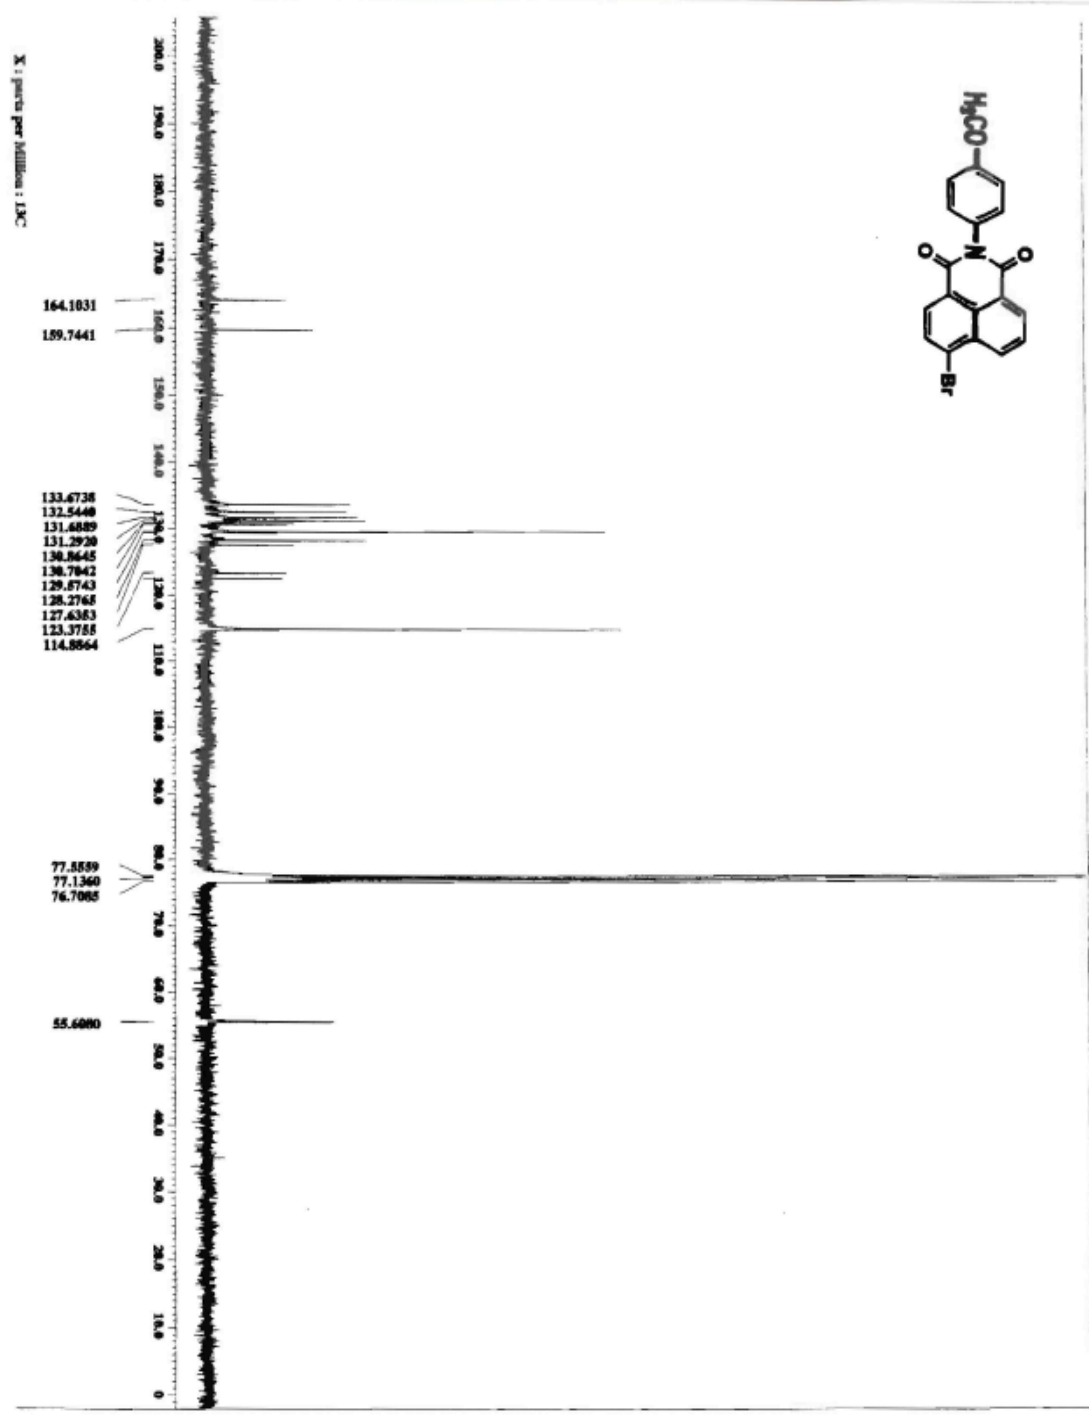

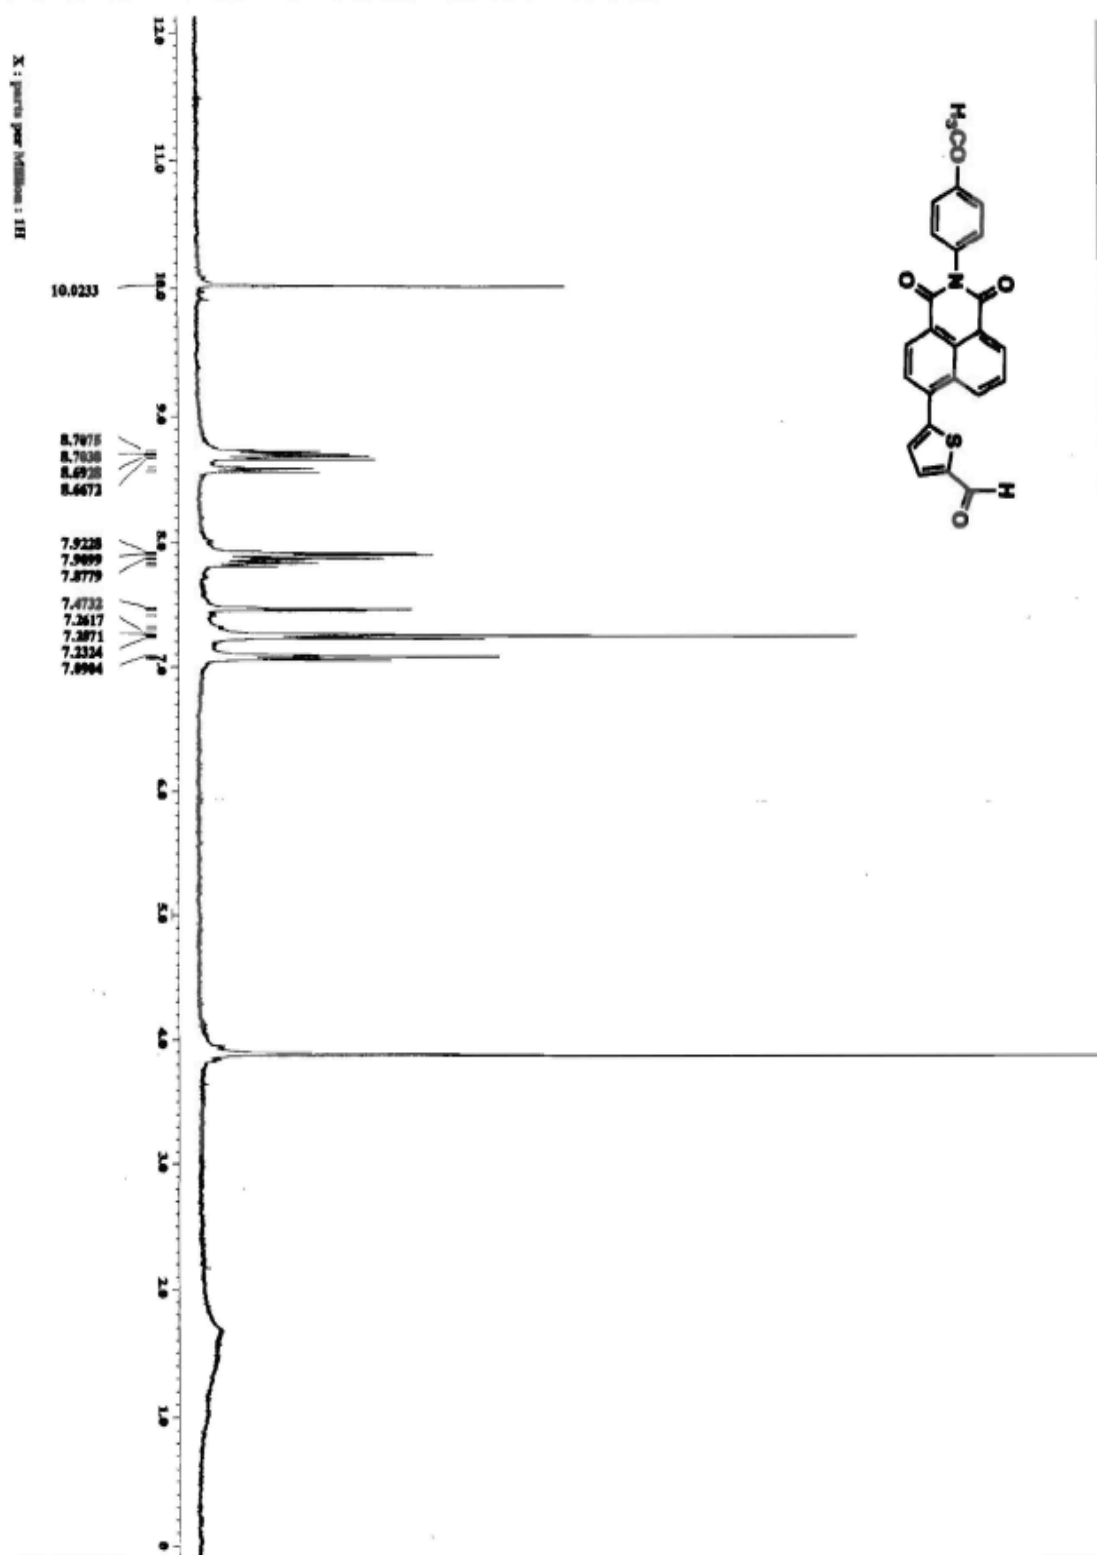



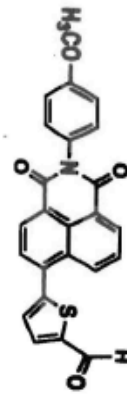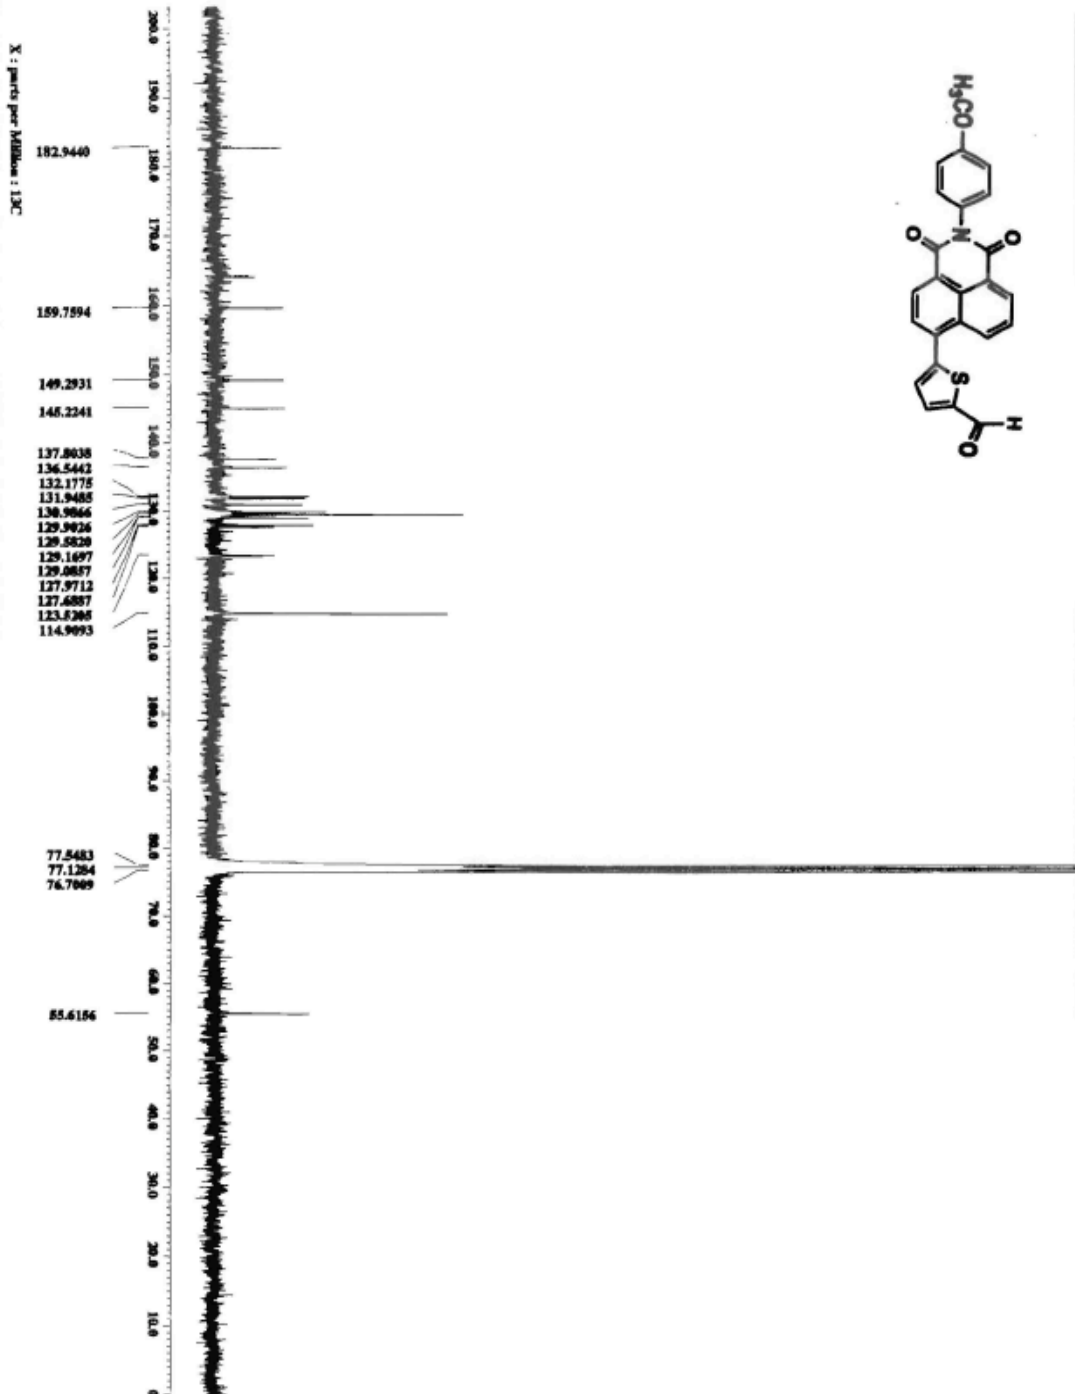

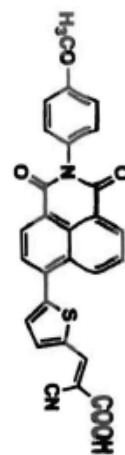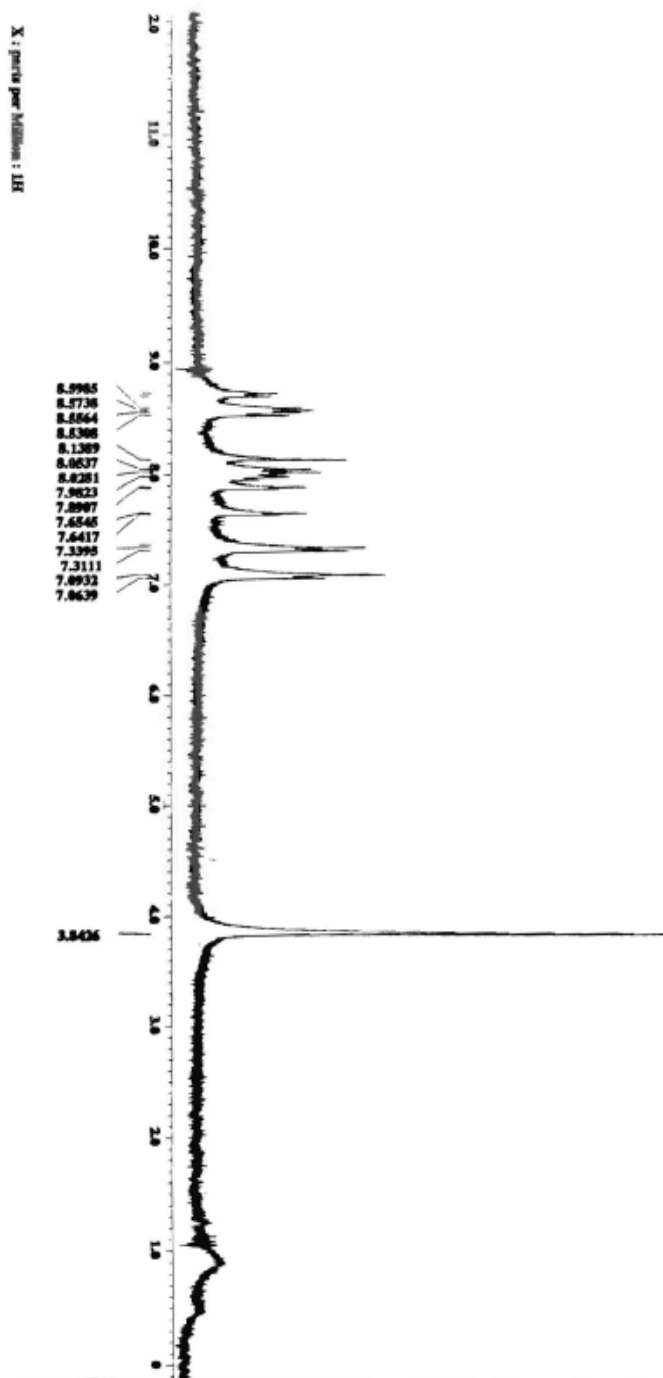

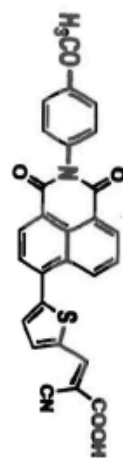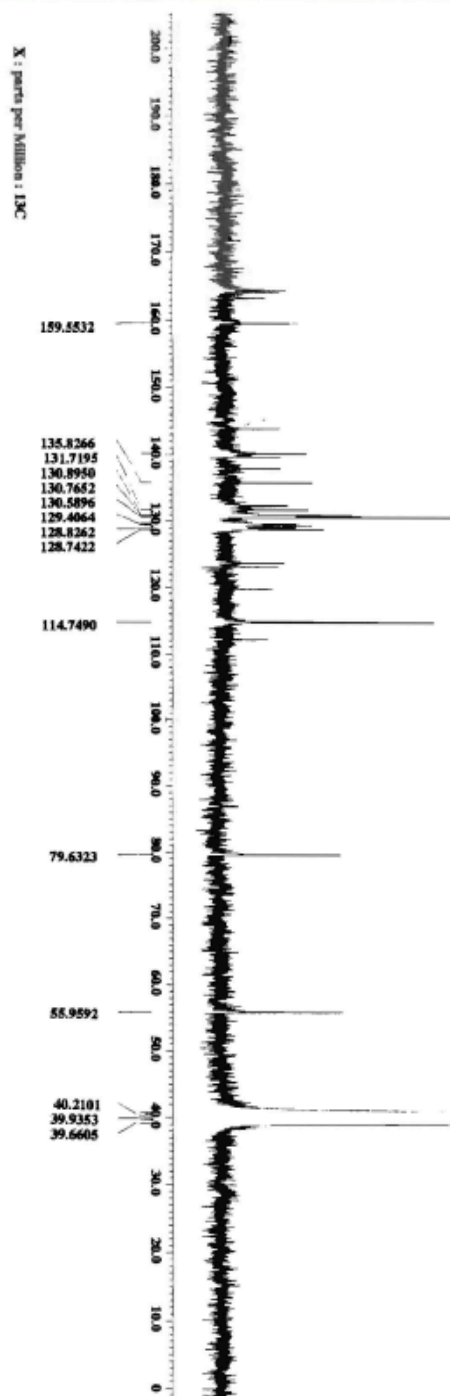

Supplement: f1 [file 264643.f1.pdf]
